# Supplementary material for: Multi-Habitat Radiomics Unravels Distinct Phenotypic Subtypes of Glioblastoma with Clinical and Genomic Significance
Source: Cancers (Basel). 2020 Jun 27;12(7):1707. doi: 10.3390/cancers12071707 (PMC7408408; doi:10.3390/cancers12071707)

## Supplementary Material

1. Supplementary Tables
2. Supplementary Figures

**Supplementary Table S1.** Molecular and clinical characteristics of study cohorts

|                                             | Training cohort<br>(SMC) | Validation cohort<br>(Vienna) | p-value |
|---------------------------------------------|--------------------------|-------------------------------|---------|
| No. of patients                             | 144                      | 56                            |         |
| Age<br>(mean±s.d.)                          | 57.8±1.0                 | 56.9±1.8                      | 0.683   |
| Male : Female                               | 78:66                    | 36:20                         | 0.207   |
| IDH1 mutation status<br>(mutant (%))        | 3.8% (5/131)             | 7.3% (3/41)                   | 0.397   |
| MGMT methylation status<br>(methylated (%)) | 50% (71/142)             | NA                            | NA      |
| Operation extent<br>(GTR (%))               | 54.2% (78/144)           | 46.7% (14/30)                 | 0.683   |

\*fisher's exact test for categorical value; wilcox.test for continuous value

NA, not available

**Supplementary Table S2.** Sensitivity analysis of the Cox regression model

| Features | Z-score |         |                            |
|----------|---------|---------|----------------------------|
|          | Minimum | Maximum | Cut off for low-risk group |

|                                                     |           |           |                            |
|-----------------------------------------------------|-----------|-----------|----------------------------|
| shape – flatness                                    | -3.4472   | 1.9706    | > -0.0976                  |
| histogram- skewness (T1CE)                          | -2.0563   | 4.4311    | > -0.1735                  |
| GLSZM- gray level non-uniformity, normalized (T1CE) | -3.0759   | 3.6433    | < 0.3032                   |
| GLCM-autocorrelation (T2)                           | -1.991    | 3.0934    | > -0.1535                  |
| GLCM-MCC (T2)                                       | -1.9868   | 2.9021    | > -0.1474                  |
| histogram-kurtosis (FLAIR)                          | -1.1041   | 5.2424    | > -4.1387                  |
| GLCM-difference entropy (FLAIR)                     | -5.6988   | 1.9248    | < 1.3061                   |
| Raw value                                           |           |           |                            |
|                                                     | Minimum   | Maximum   | Cut off for low-risk group |
| shape – flatness                                    | 0.1784    | 0.8799    | > 0.6121                   |
| histogram- skewness (T1CE)                          | -1.3833   | 2.8322    | > -0.1599                  |
| GLSZM- gray level non-uniformity, normalized (T1CE) | 0.0389    | 0.0880    | < 0.0636                   |
| GLCM-autocorrelation (T2)                           | 1565.5680 | 9858.9461 | > 4562.7913                |
| GLCM-MCC (T2)                                       | 0.4151    | 0.9682    | > 0.6232                   |
| histogram-kurtosis (FLAIR)                          | 1.9193    | 14.5936   | > -4.1410                  |
| GLCM-difference entropy (FLAIR)                     | 2.6083    | 5.4509    | < 5.2202                   |

**Abbreviation:** *T1CE*, T1 contrast-enhancement; *GLSZM*, gray-level size zone matrix; *GLCM*, gray-level co-occurrence matrix; *MCC*, maximal correlation coefficient; *FLAIR*, fluid attenuated inversion recovery

## **Supplementary Figure legends**

**Supplementary Figure S1.** Decision of number of clusters (k) during consensus clustering; to determine the optimal number of clusters in training cohort, CDFs (cumulative distribution of consensus matrices) and delta area (area under the CDFs) were evaluated to quantify the concentration of the consensus distribution. The number of clusters, k, was chosen to maximize the concentration by inspecting CDFs' shape and progression.

**Supplementary Figure S2.** Principal component analysis of radiomics profiling of glioblastoma (GBM) patients revealed the highlighted features per corresponding radiomics subtype

**Supplementary Figure S3.** Comparison of radiomics features values between radiomics subtypes

**Supplementary Figure S4.** Hazard ratio plot derived from multi-variate cox regression analysis

**Supplementary Figure S5.** Top 30 correlative gene sets to T2 autocorrelation (GLCM) feature

**Supplementary Figure S6.** Characterized genomic signatures according to radiomics subtype; a heatmap using single sample geneset enrichment scores (left) and GSEA enrichment plots (right)

**Supplementary Figure S1.** Survival curves of validation cohort stratified by radiomics subtype

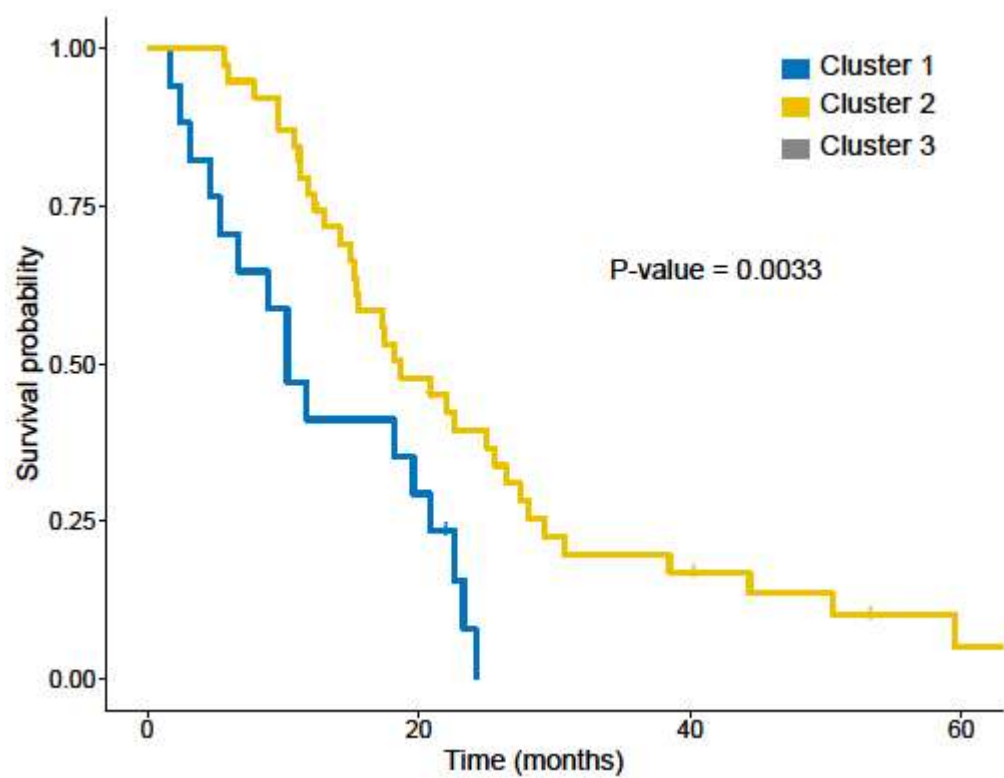

**Supplementary Figure S2.** Principal component analysis of radiomics profiling of glioblastoma (GBM) patients revealed the highlighted features per corresponding radiomics subtype

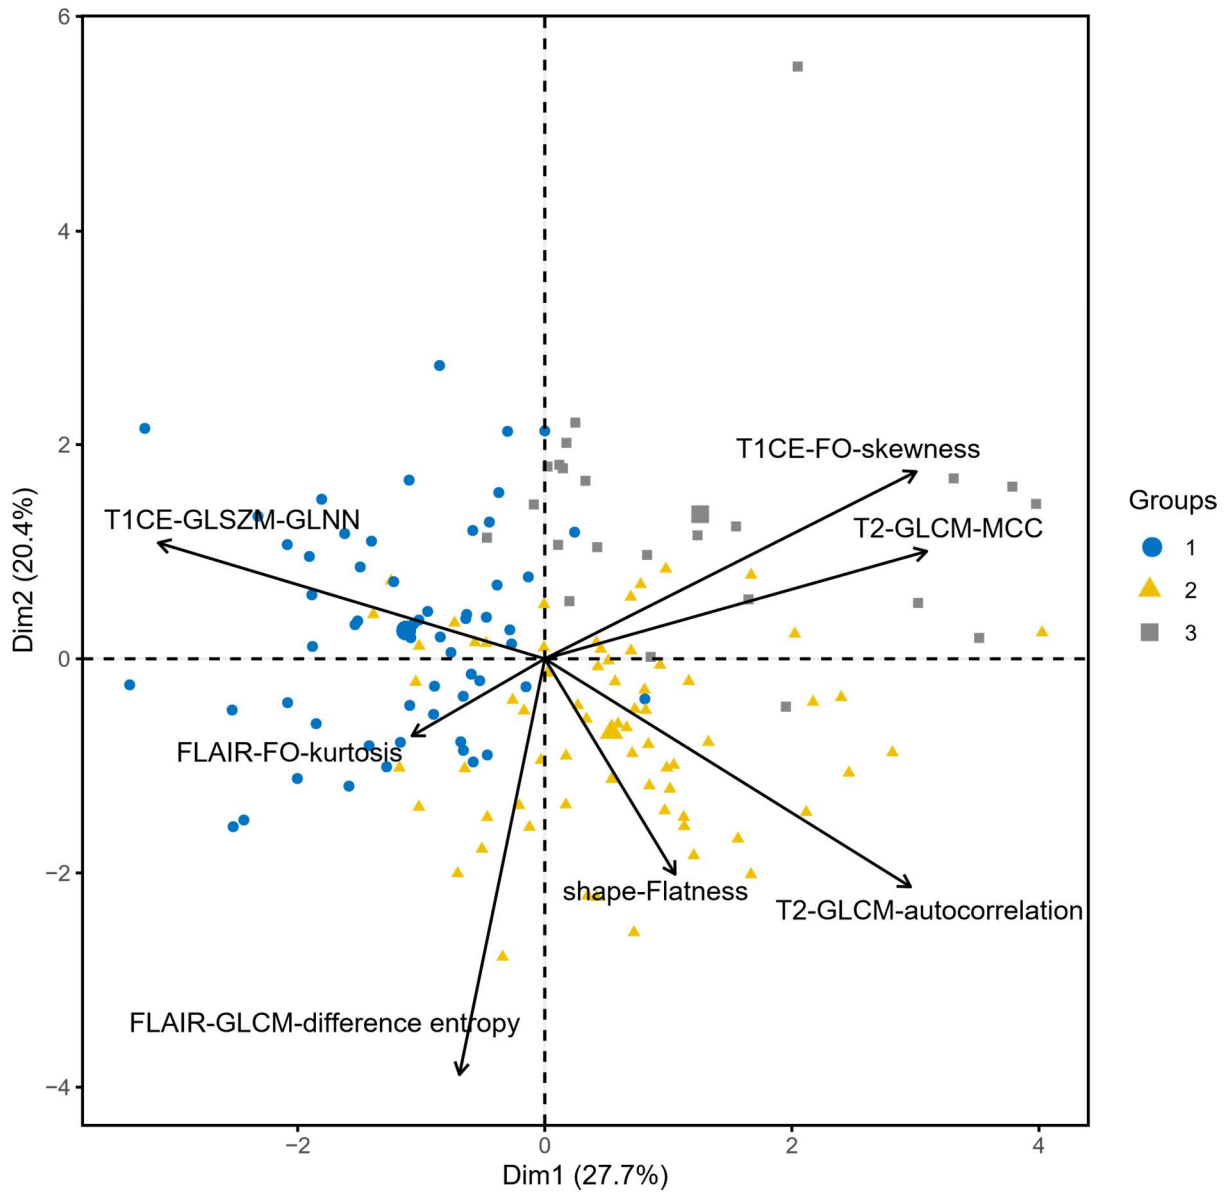

**Supplementary Figure S3.** Comparison of radiomics features values between radiomics subtypes

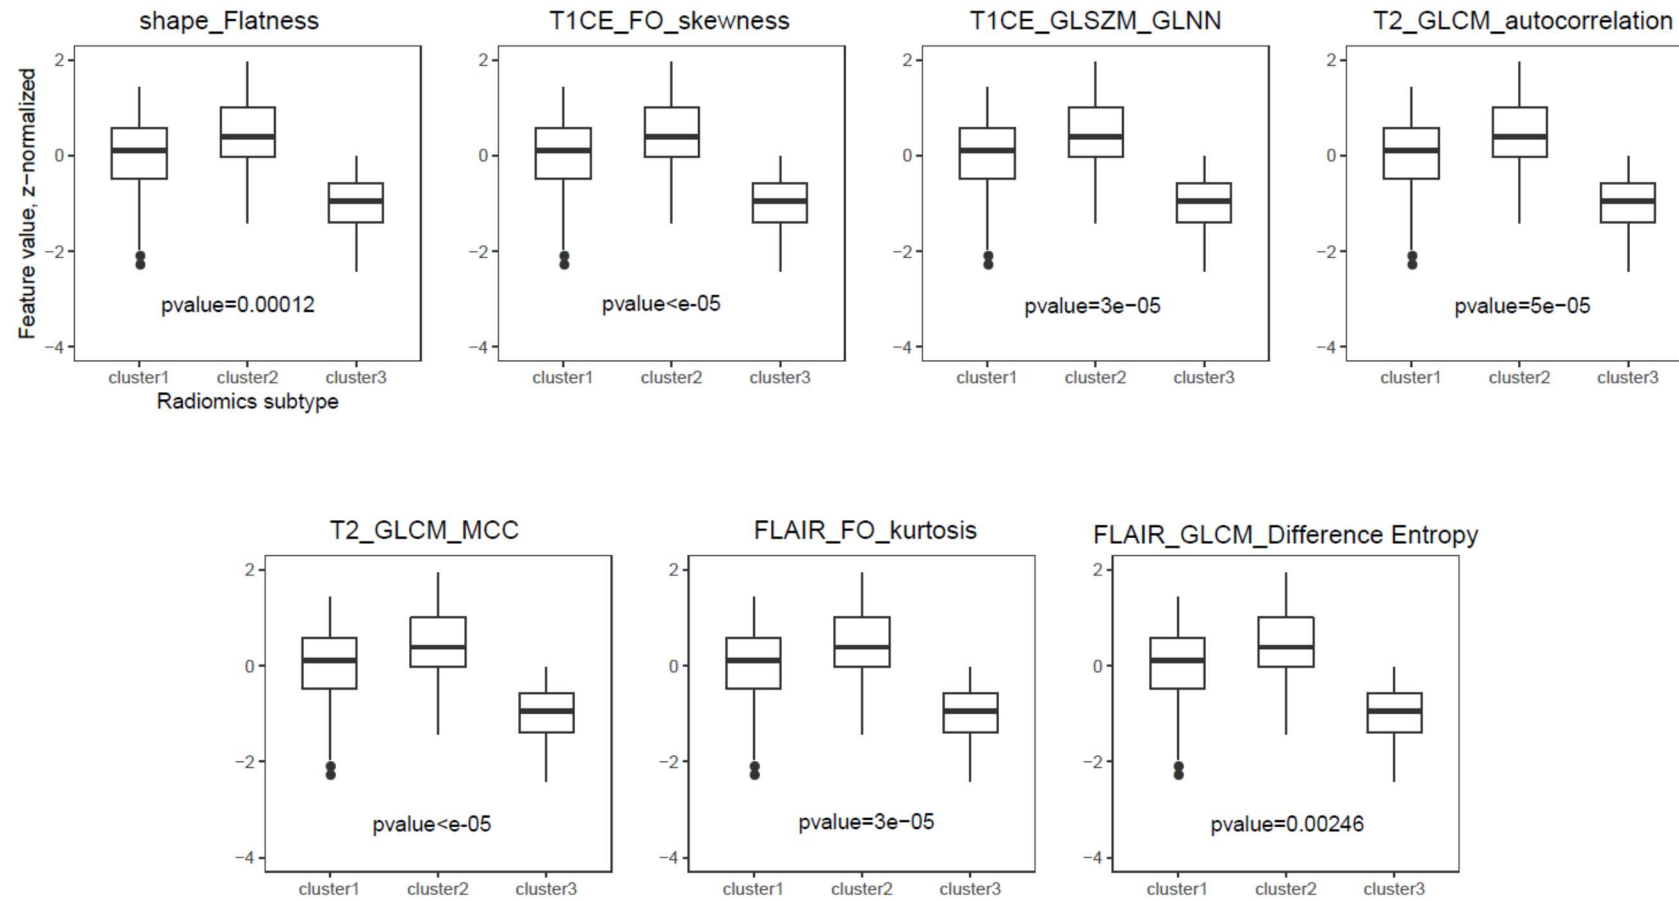

**Supplementary Figure S4.** Hazard ratio plot derived from multi-variate cox regression analysis

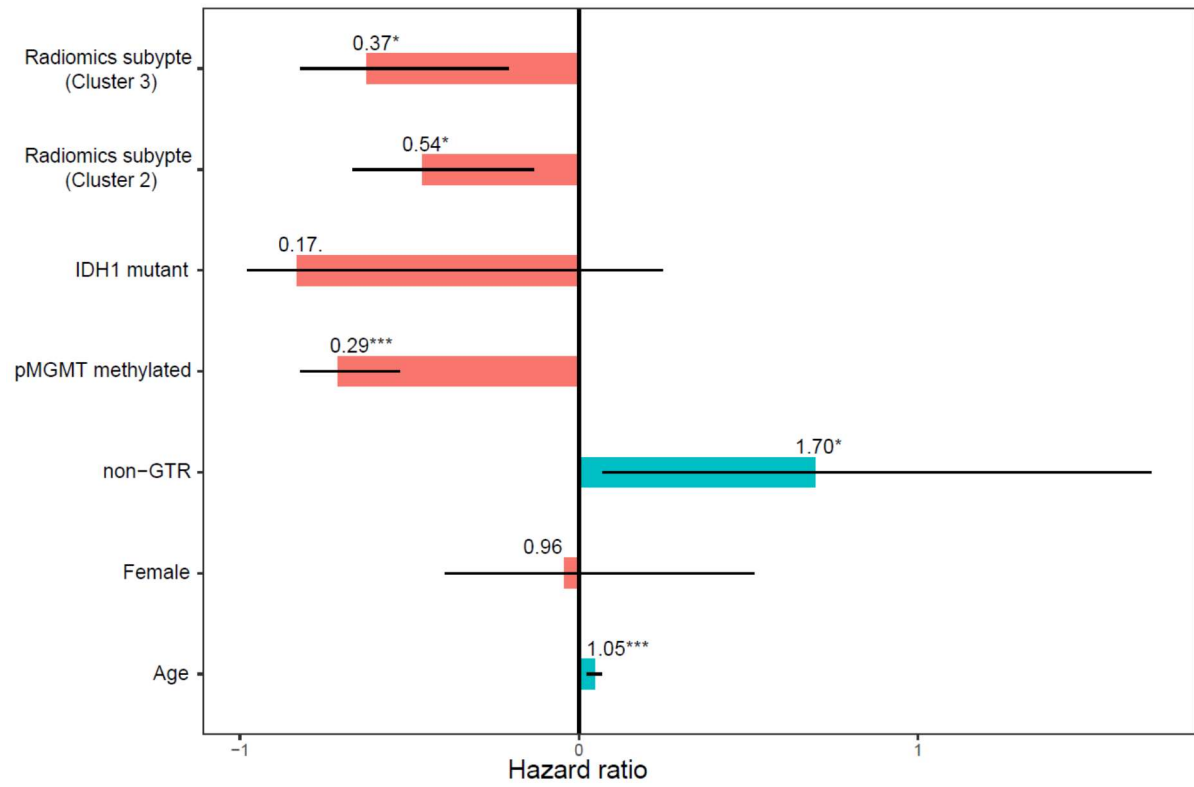

**Supplementary Figure S5.** Top 30 correlative gene sets to T2 autocorrelation (GLCM) feature

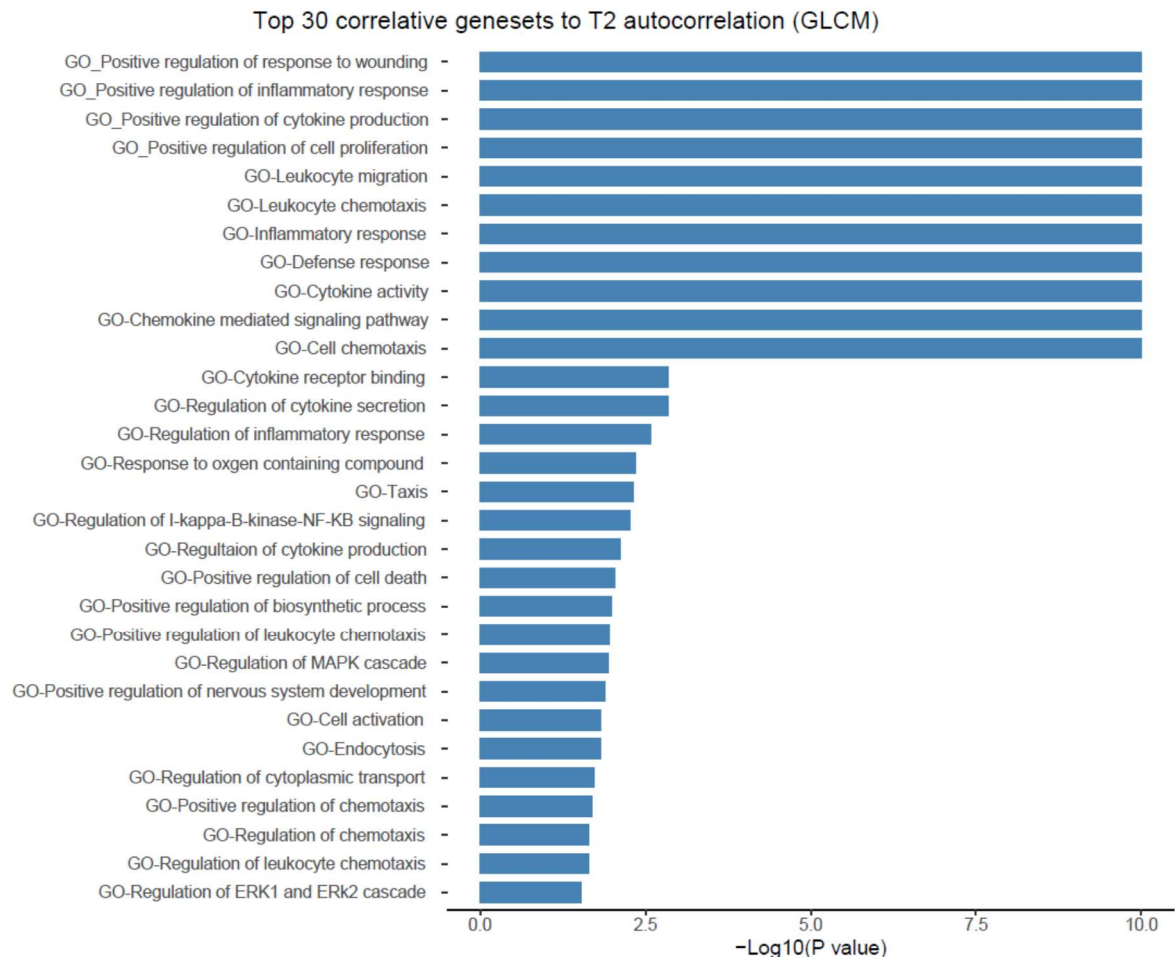

**Supplementary Figure S6.** Characterized genomic signatures according to radiomics subtype; a heatmap using single sample geneset enrichment scores (left) and GSEA enrichment plots (right)

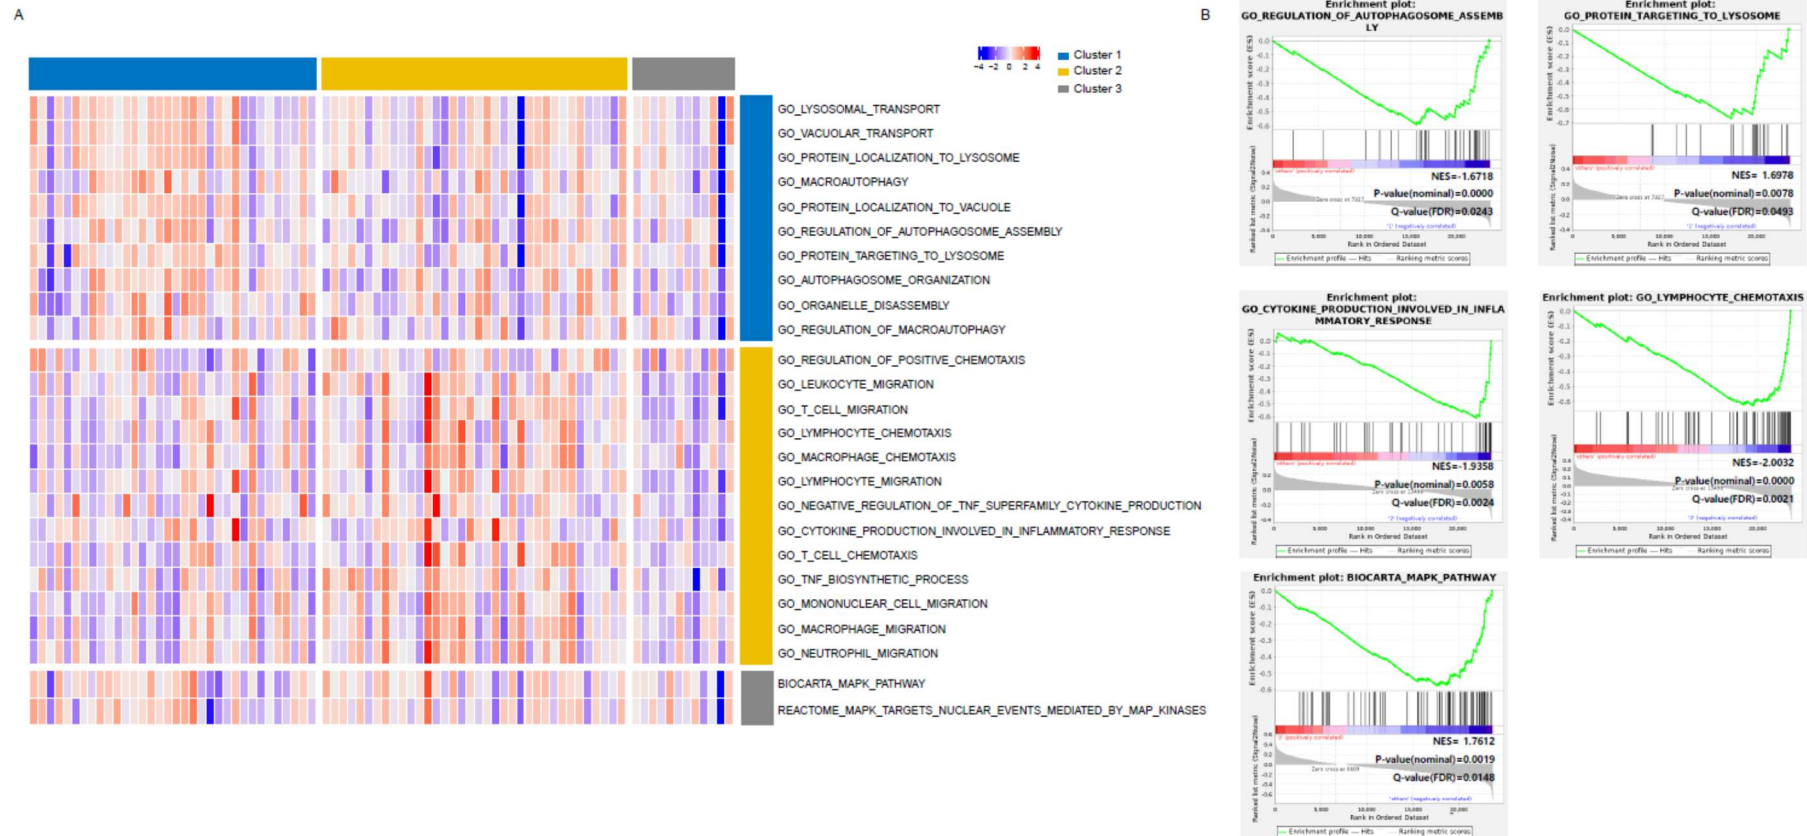

Supplement: Supplementary file 1 [file cancers-12-01707-s001.pdf]
